# Supplementary material
Source: PubMed Central journal article supplement (PMC5567995)

Supplementary Figure 1 - Uncropped scans with size marker indications

Anti-GFP WB

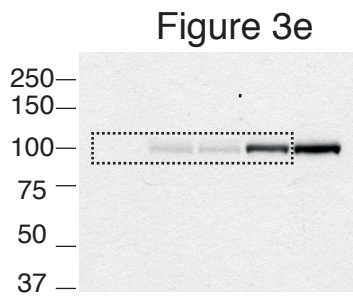

Anti-Cdc2 WB

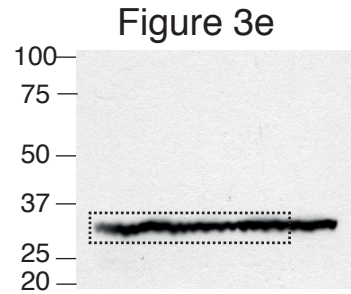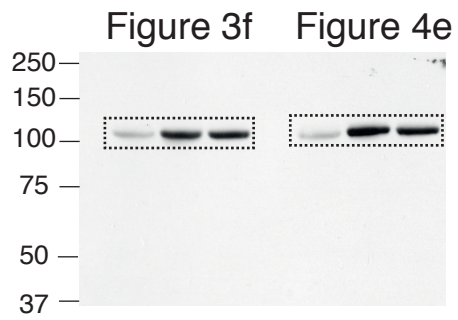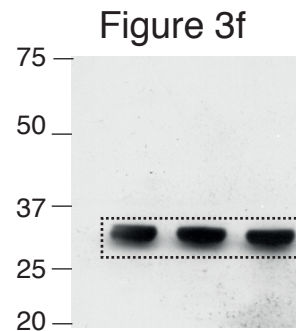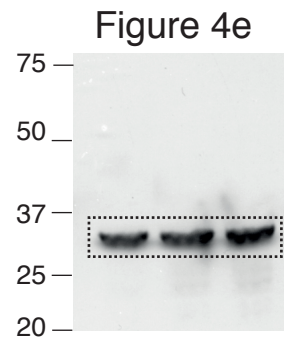

Supplement: NIHMS841824-supplement-supp_fig1.pdf [file NIHMS841824-supplement-supp_fig1.pdf]
